# Supplementary material for: ESIPT-Related Origin of Dual Fluorescence in the Selected Model 1,3,4-Thiadiazole Derivatives
Source: PubMed Central journal article supplement (PMC7570705; doi:10.3390/molecules25184168), 2020-09-11
Supplement: molecules-25-04168-s001.pdf [file molecules-25-04168-s001.pdf]

# ESIPT-Related Origin of Dual Fluorescence in the Selected Model 1,3,4-Thiadiazole Derivatives

Grzegorz Czernel <sup>1</sup>, Iwona Budziak <sup>2</sup>, Anna Oniszczyk <sup>3,\*</sup>, Dariusz Karcz <sup>4,\*</sup>, Katarzyna Pustuła <sup>5</sup>, Andrzej Górecki <sup>6</sup>, Alicja Matwijczuk <sup>1</sup>, Bożena Gładyszewska <sup>1</sup>, Mariusz Gagoś <sup>7</sup>, Andrzej Niewiadomy <sup>8</sup> and Arkadiusz Matwijczuk <sup>1,\*</sup>

<sup>1</sup> Department of Biophysics, University of Life Sciences in Lublin, Akademicka 13, 20-950 Lublin, Poland; grzegorz.czernel@up.lublin.pl (G.Z.); alicja.matwijczuk@up.lublin.pl (A.M.); bozena.gladyszewska@up.lublin.pl (B.G.)

<sup>2</sup> Department of Chemistry, University of Life Sciences in Lublin, Akademicka 15, 20-950 Lublin, Poland; iwona.budziak@up.lublin.pl

<sup>3</sup> Department of Inorganic Chemistry, Medical University in Lublin, 20-059 Lublin, Poland

<sup>4</sup> Department of Analytical Chemistry (C1), Faculty of Chemical Engineering and Technology, Cracow University of Technology, Warszawska 24, 31-155 Cracow, Poland

<sup>5</sup> Department of Theoretical Chemistry, Faculty of Chemistry, Jagiellonian University, Gronostajowa 2, 30-387 Kraków, Poland; pustulak@chemia.uj.edu.pl

<sup>6</sup> Department of Physical Biochemistry, Faculty of Biochemistry, Biophysics and Biotechnology of the Jagiellonian University, Gronostajowa 7, 30-387 Kraków, Poland; andrzej.gorecki@uj.edu.pl

<sup>7</sup> Department of Cell Biology, Institute of Biology and Biochemistry, Maria Curie-Skłodowska University, Akademicka 19, 20-033 Lublin, Poland; mariusz.gagos@poczta.umcs.lublin.pl

<sup>8</sup> Institute of Industrial Organic Chemistry, Annopol 6, 03-236 Warsaw, Poland; andrzej.niewiadomy@up.lublin.pl

\* Correspondence: anna.oniszczyk@umlub.pl (A.O.); dariusz.karcz@pk.edu.pl (D.K.); arkadiusz.matwijczuk@up.lublin.pl (A.M.); Tel.: +48-814-456-937 (A.M.); Fax: +48-814-456-684 (A.M.)

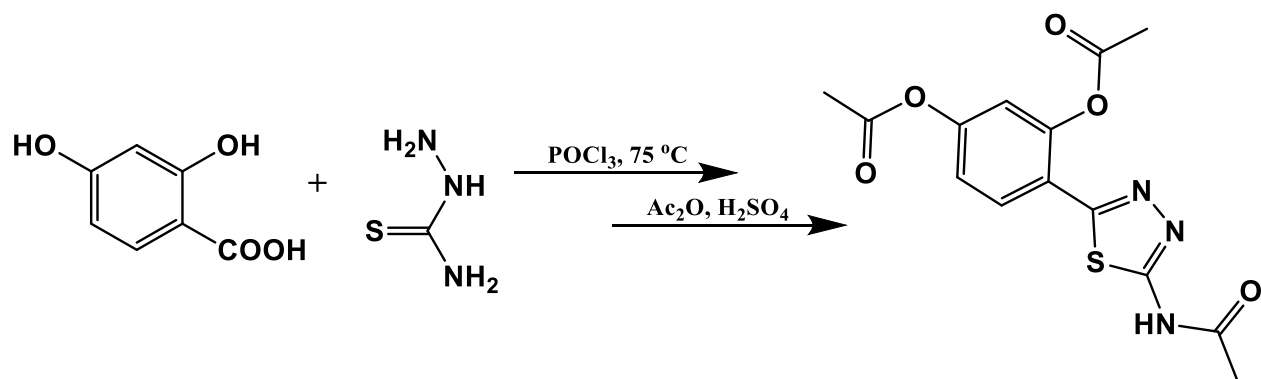

Scheme S1. Synthesis of ADAPT.

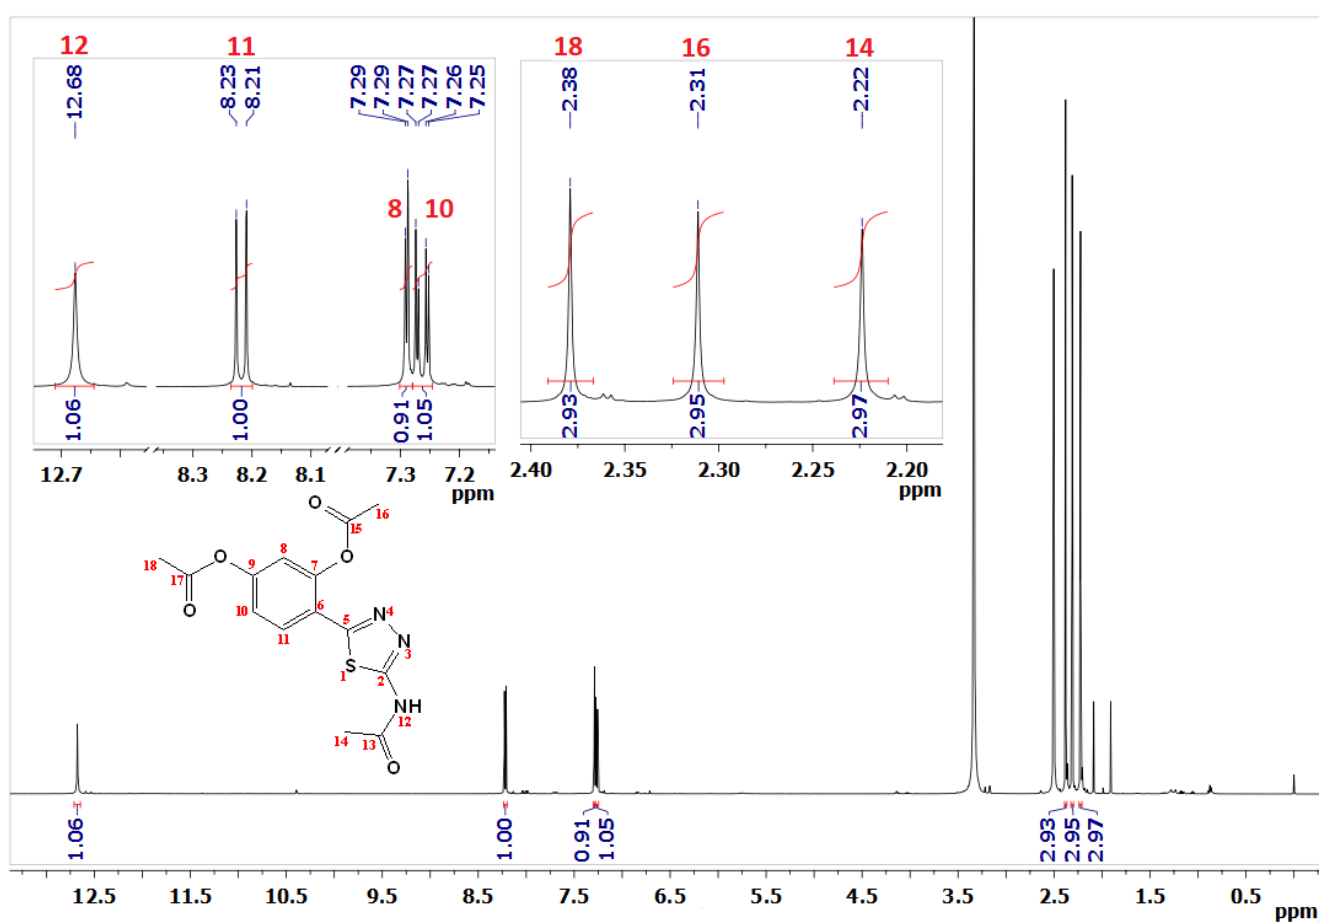

Figure S1.  $^1\text{H}$ -NMR spectrum of ADAPT with inserts showing the numbering system of atoms and the expanded view of all signals.

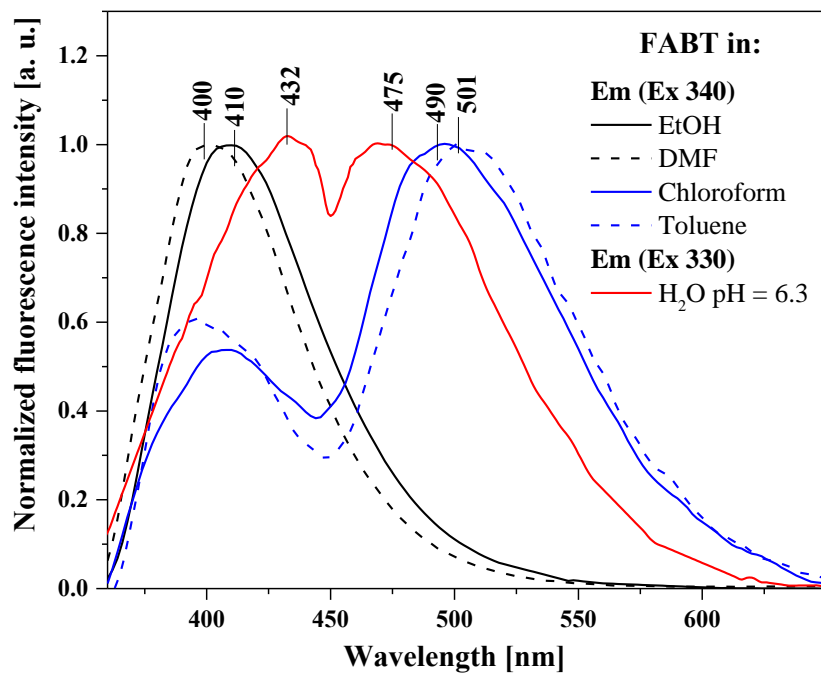

Figure S2. Fluorescence emission spectra for FABT in ethanol, DMF, chloroform and toluene.

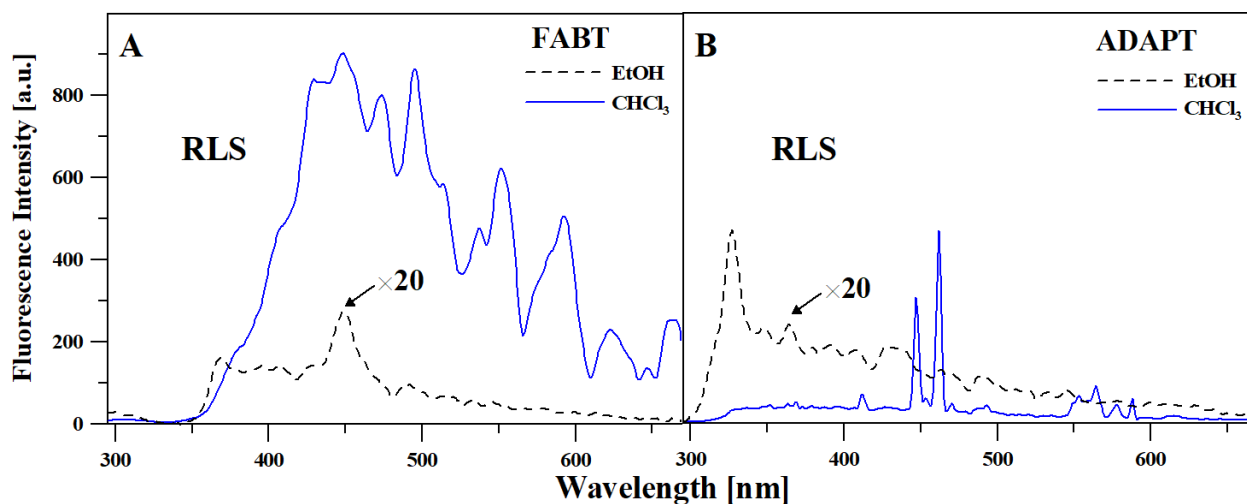

Figure S3. Resonance light scattering spectra (RLS) for FABT (Panel A) and ADAPT (Panel B) in ethanol and chloroform. The RLS bands for FABT in ethanol were multiplied by the factor of 20 for better visibility of the effect.

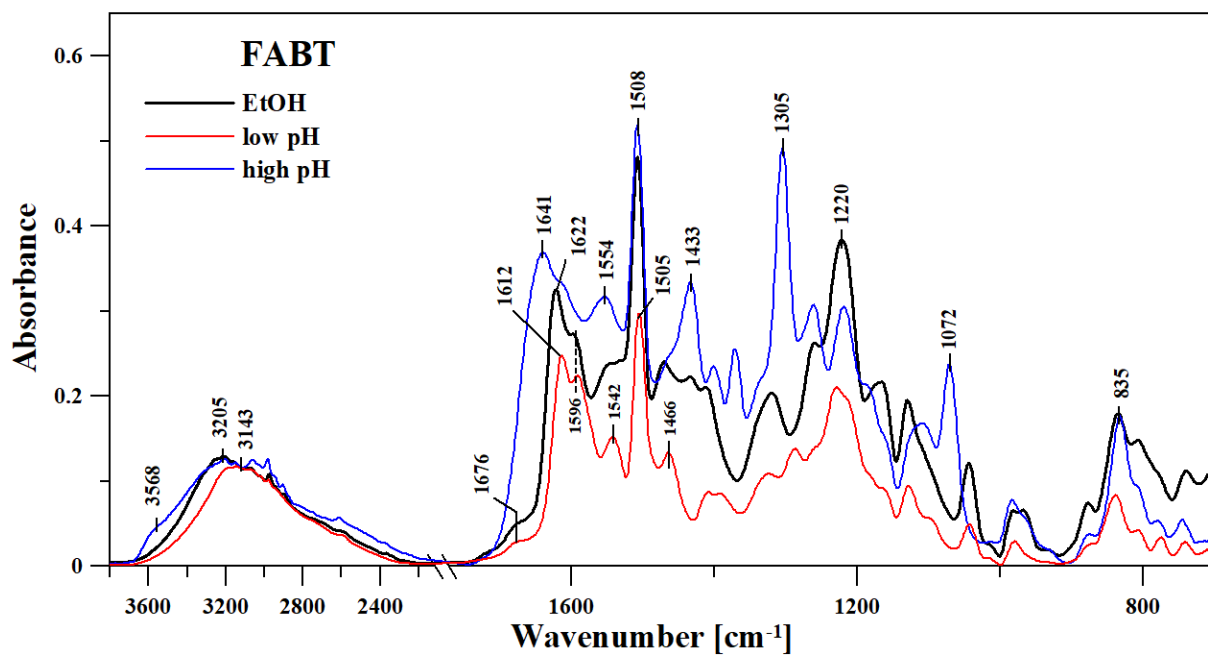

Figure S4. The infrared spectra for FABT in ethanol and in ethanol with the addition of acid or base.

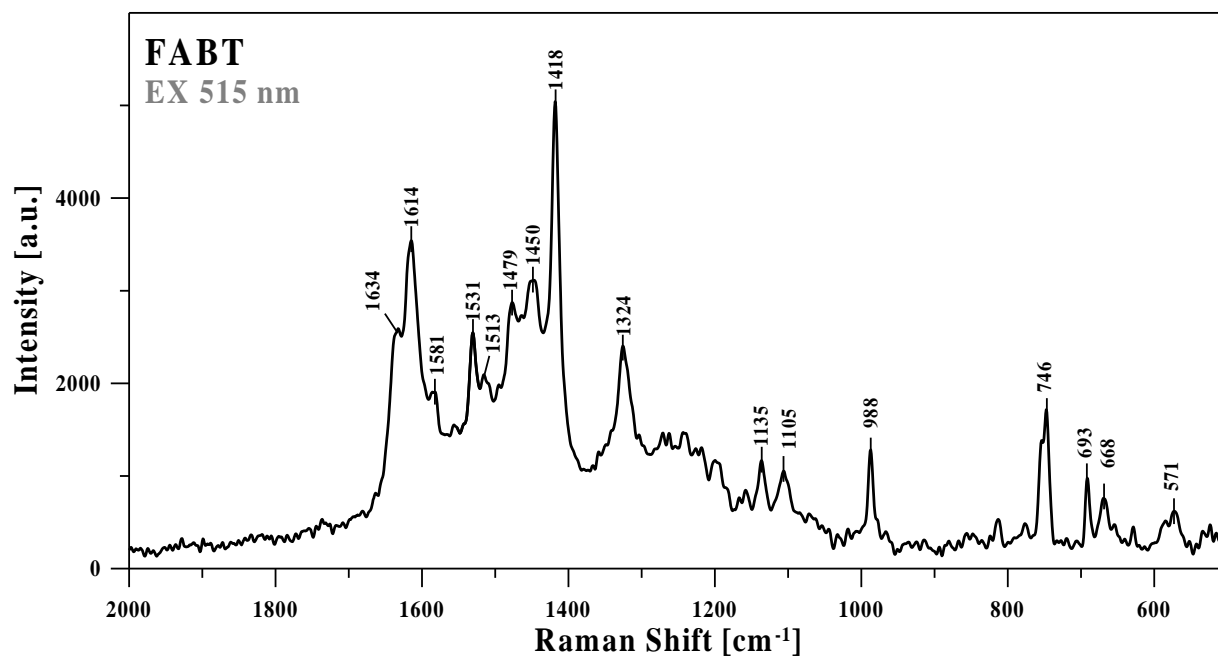

Figure S5. The Raman spectra for FABT in ethanol.

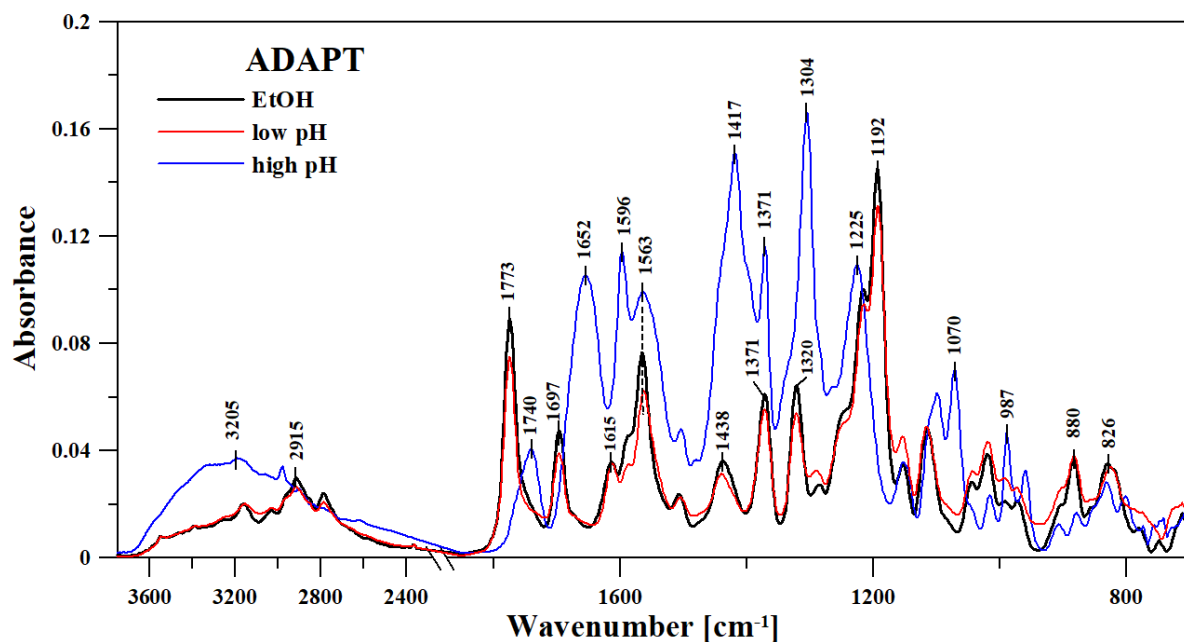

Figure S6. The infrared spectra for ADAPT in ethanol and in ethanol with the addition of acid or base.

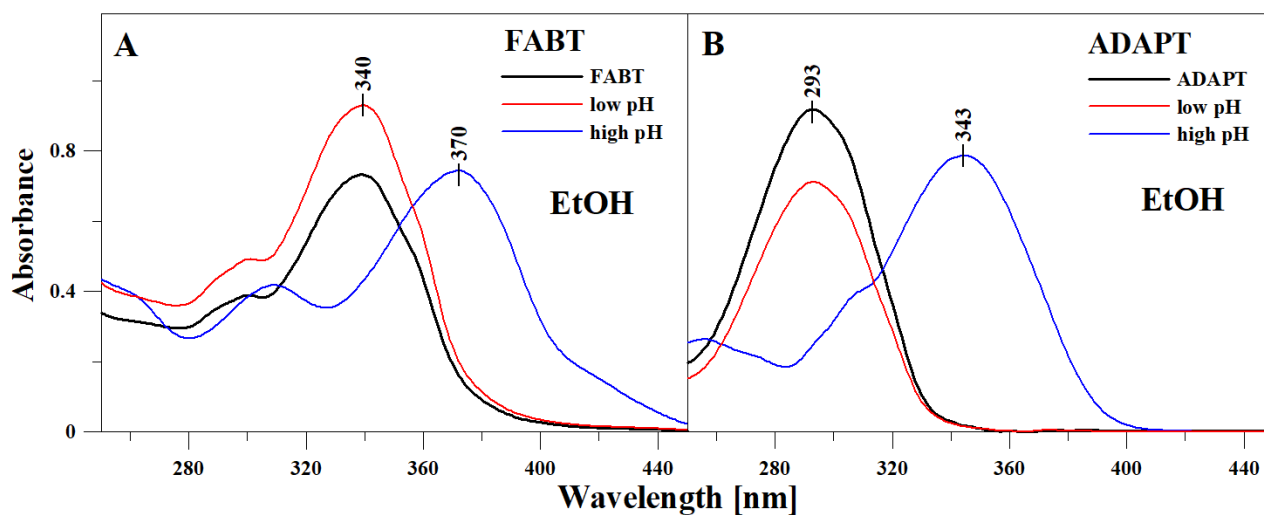

Figure S7. The electronic absorption spectra for FABT (Panel A) and ADAPT (Panel B) in ethanol, as well as in ethanol after acidification to pH ~ 1 (apparent pH) and at pH ~10 after the addition of base.

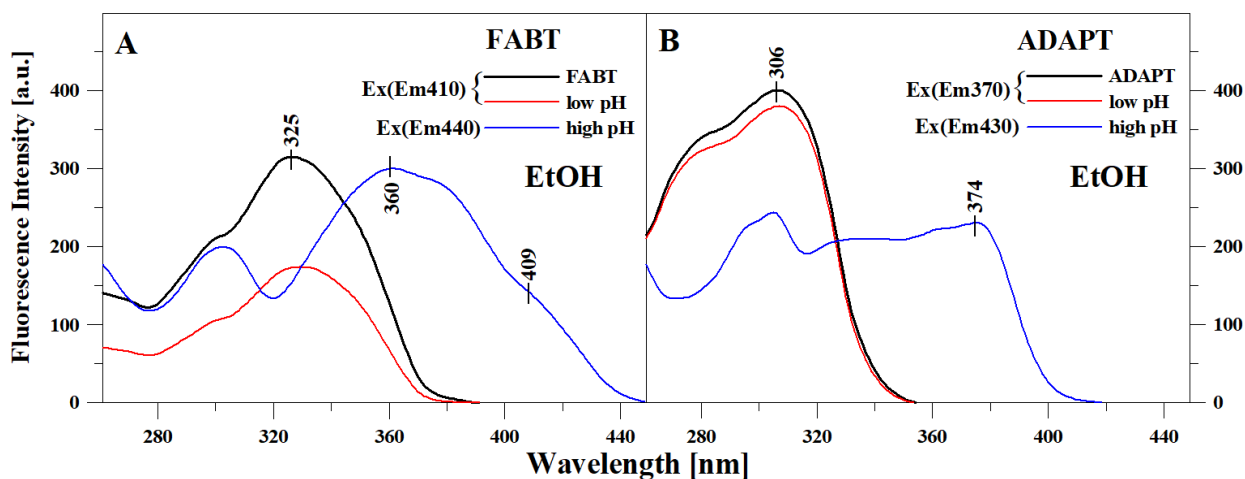

**Figure S8.** Fluorescence excitation spectra for FABT (Panel A) and ADAPT (Panel B) in ethanol and in ethanol with the addition of acid or base.

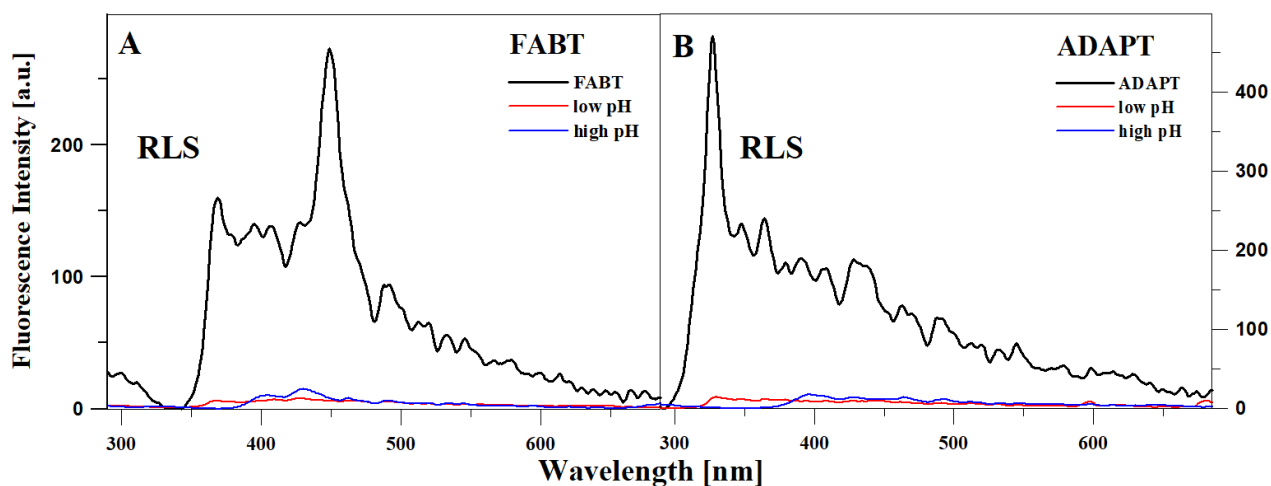

**Figure S9.** Resonance light scattering spectra (RLS) for FABT (Panel A) and ADAPT (Panel B) in ethanol and in ethanol with the addition of acid or base.

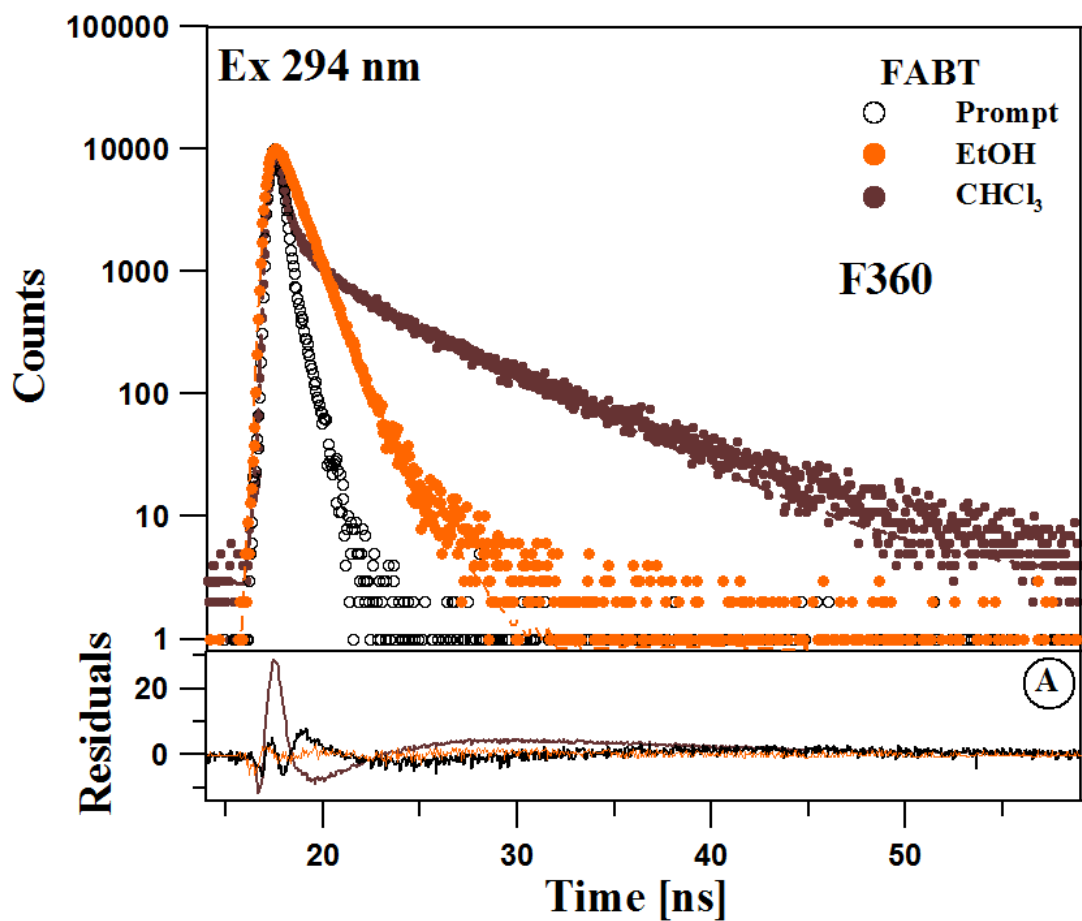

**Figure S10.** TCSPC analysis for F360 in EtOH and chloroform. The top panel presents the decay of fluorescence intensity. Black color denotes the apparatus profile. Points correspond to measurement results and the continuous line to the double component analysis. The bottom panel presents the distribution of residuals. The excitation wavelength was 294 nm.

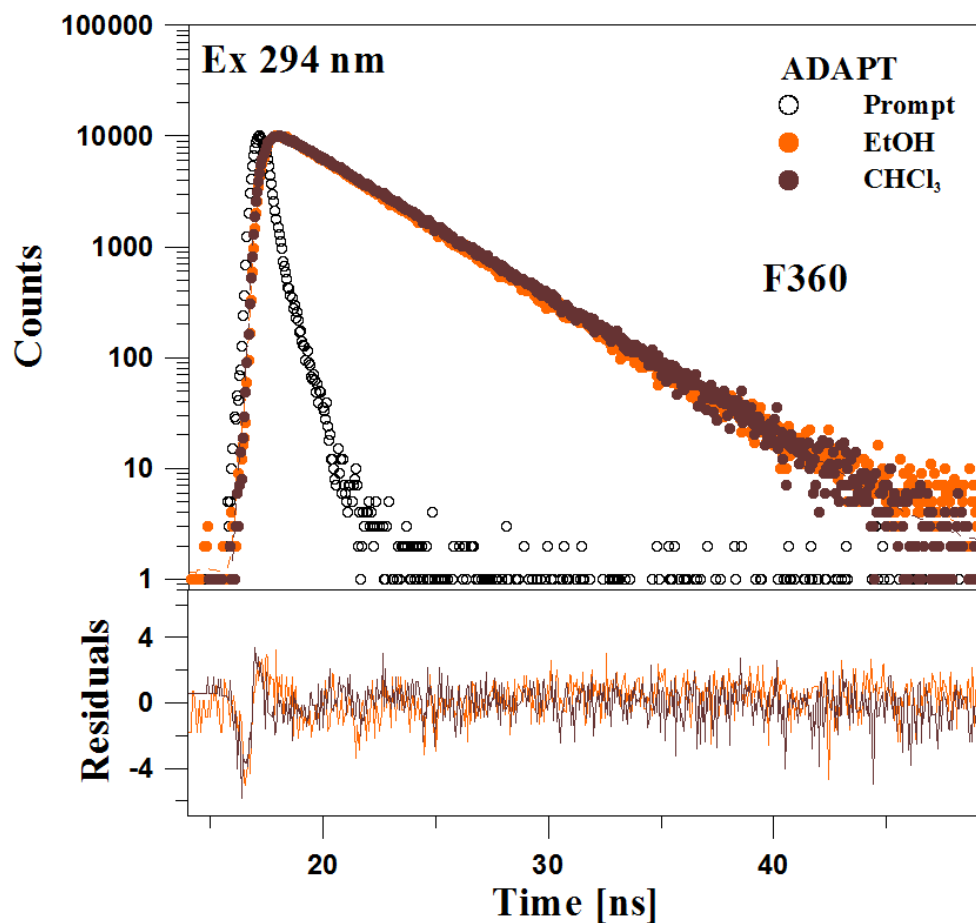

**Figure S11.** TCSPC analysis for ADAPT in EtOH and chloroform. The top panel presents the decay of fluorescence intensity. Black color denotes the apparatus profile. Points correspond to measurement results and the continuous line to the double component analysis. The bottom panel presents the distribution of residuals. The excitation wavelength was 294 nm.



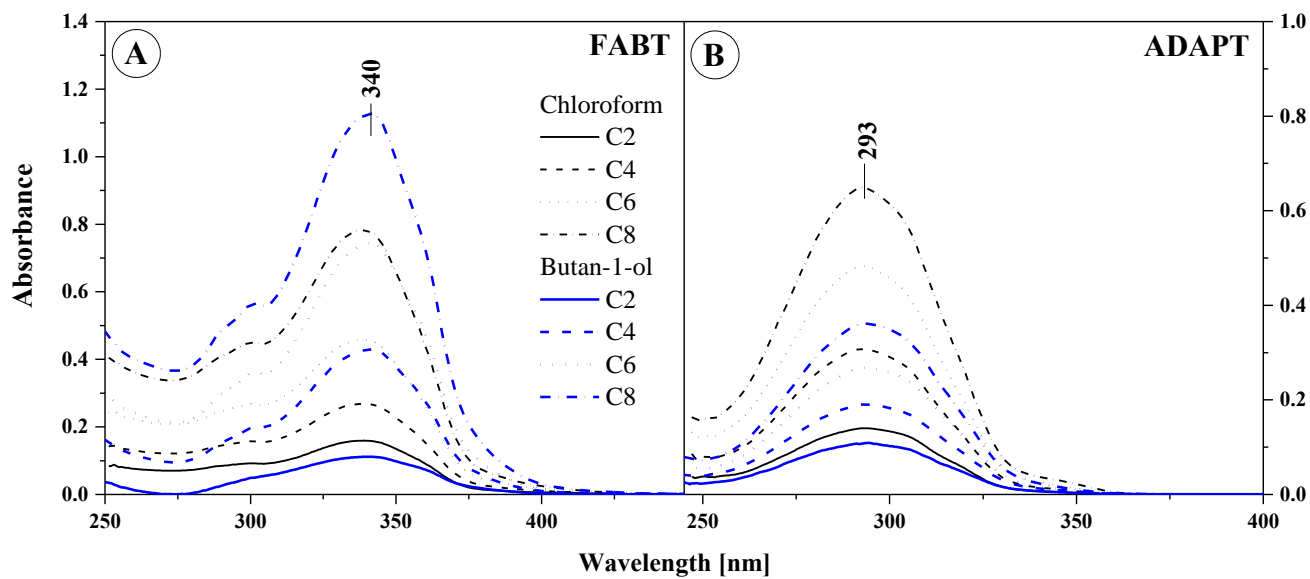

**Figure S12.** Electronic absorption spectra of FABT (panel A) and ADAPT (panel B) in different solvent (chloroform and butan-1-ol) at different dilutions. Measurements were carried out for eight different concentration C1-C8. The sample FABT and ADAPT (about 1 mg) were diluted in 1 ml of chloroform or butan-1-ol, and then appropriate aliquots of the solution were added to 3 mL of solvent. At the figure 1 chosen spectra with different concentration were shown.

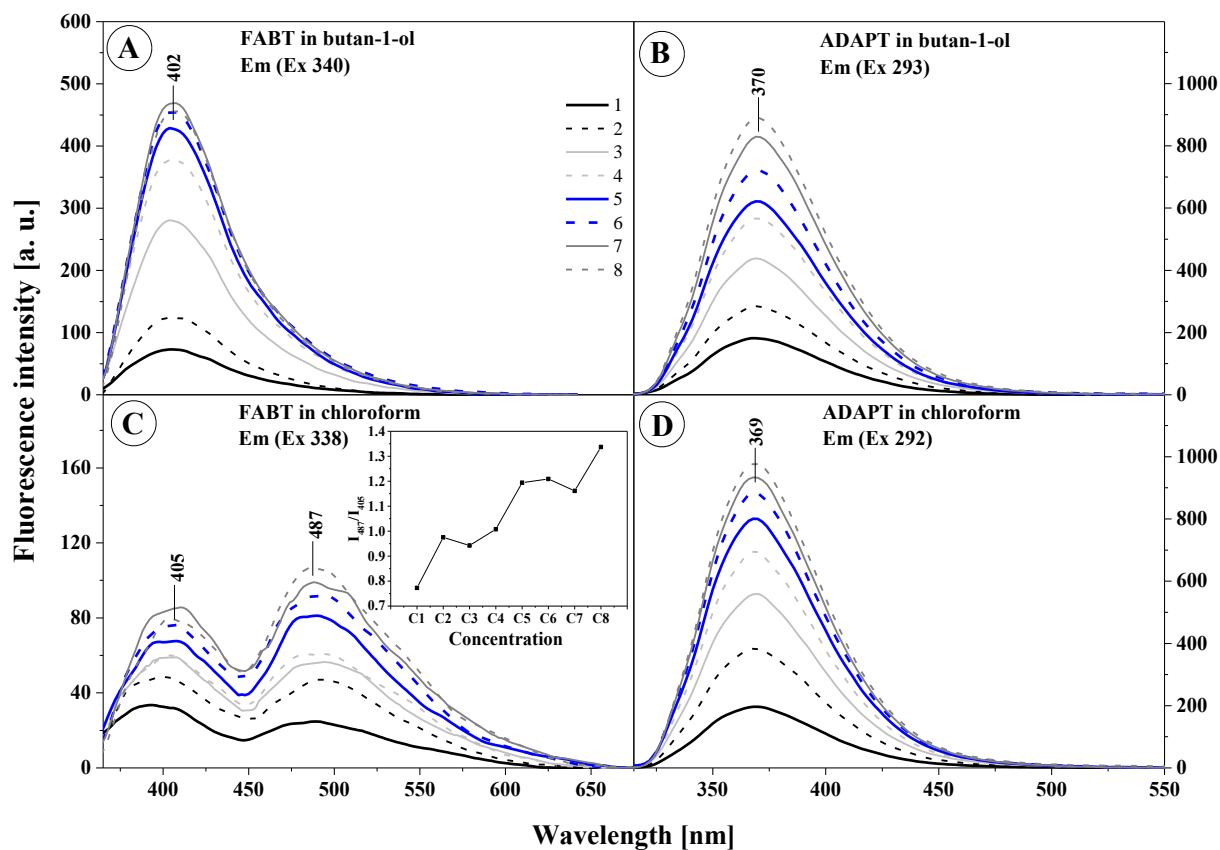

**Figure S13.** Fluorescence emission spectra of FABT (panel A and C) and ADAPT (panel B and D) according to fig. S12. Panel C shows the ratio between the fluorescence intensity at 487 nm to 405 nm according to different concentration C1-C8.

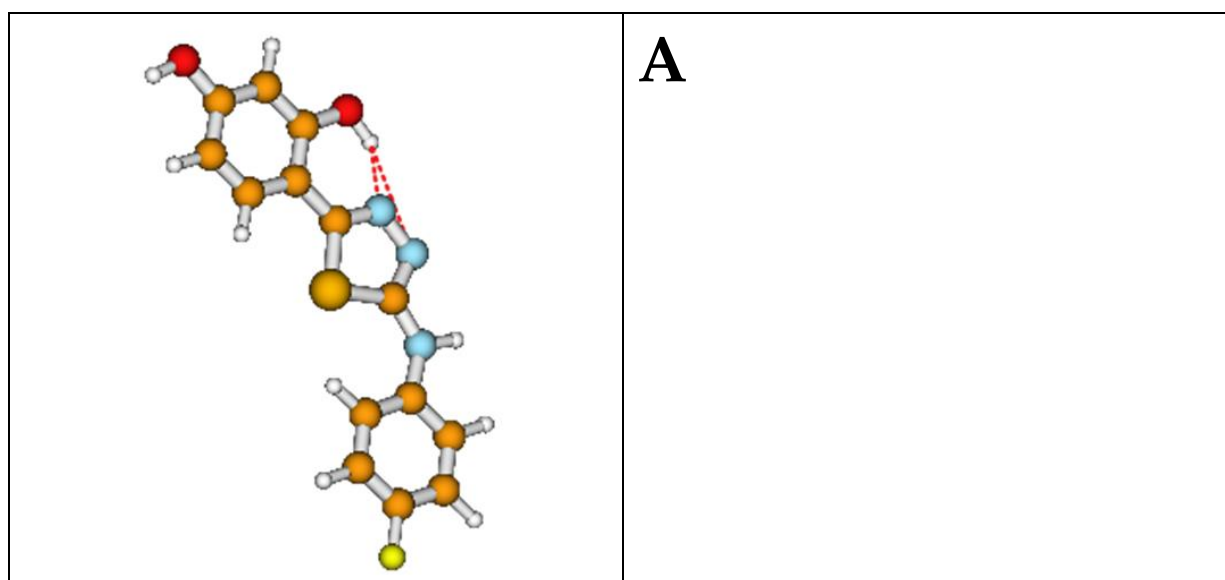

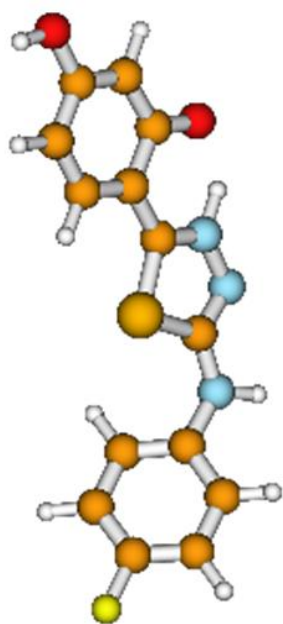

**B**

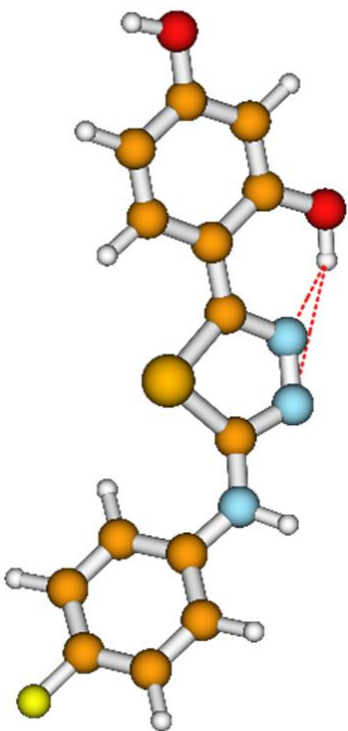

**C**



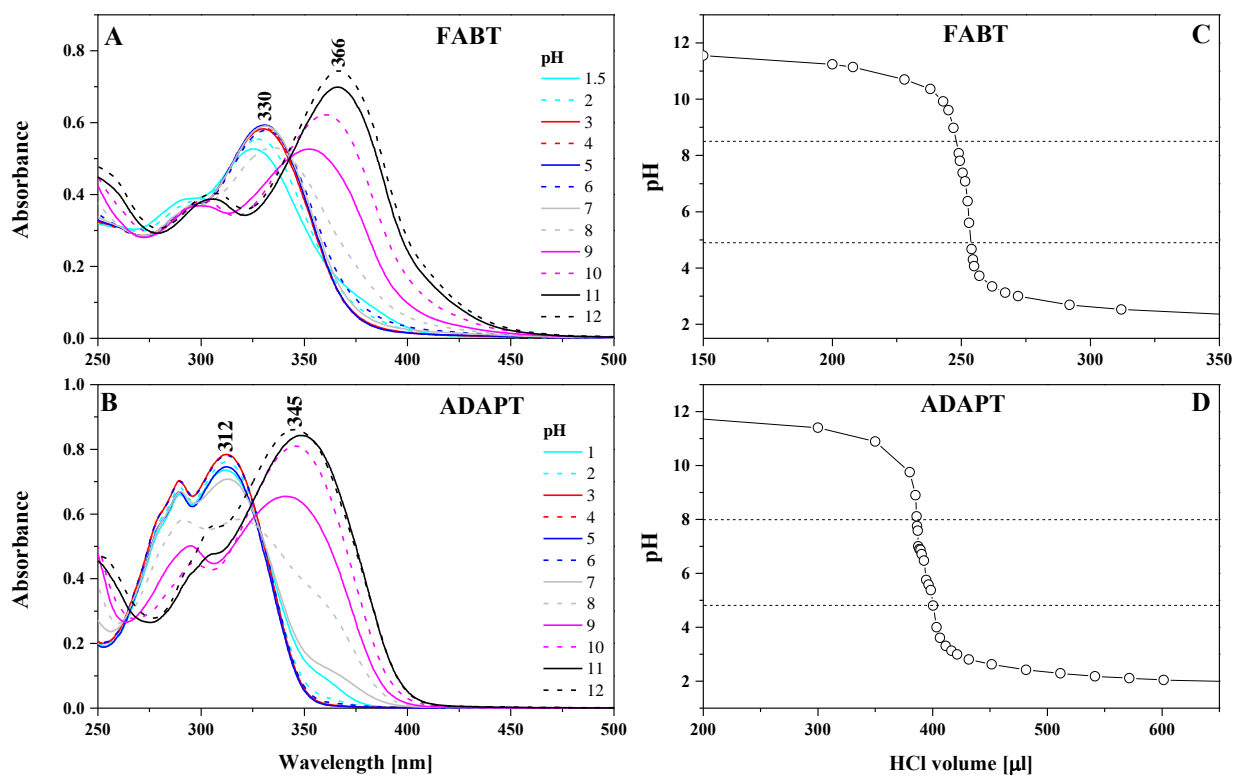

**Figure S15.** Electronic absorption spectra for FABT (panel A) and ADAPT (panel B) dissolved in H<sub>2</sub>O at varying pH (from 1.5 to 12). The spectra were not normalized. pH-metric titration curves for FABT (panel C) and ADAPT (panel D). Titration was carried out with the use of 1 M HCl.

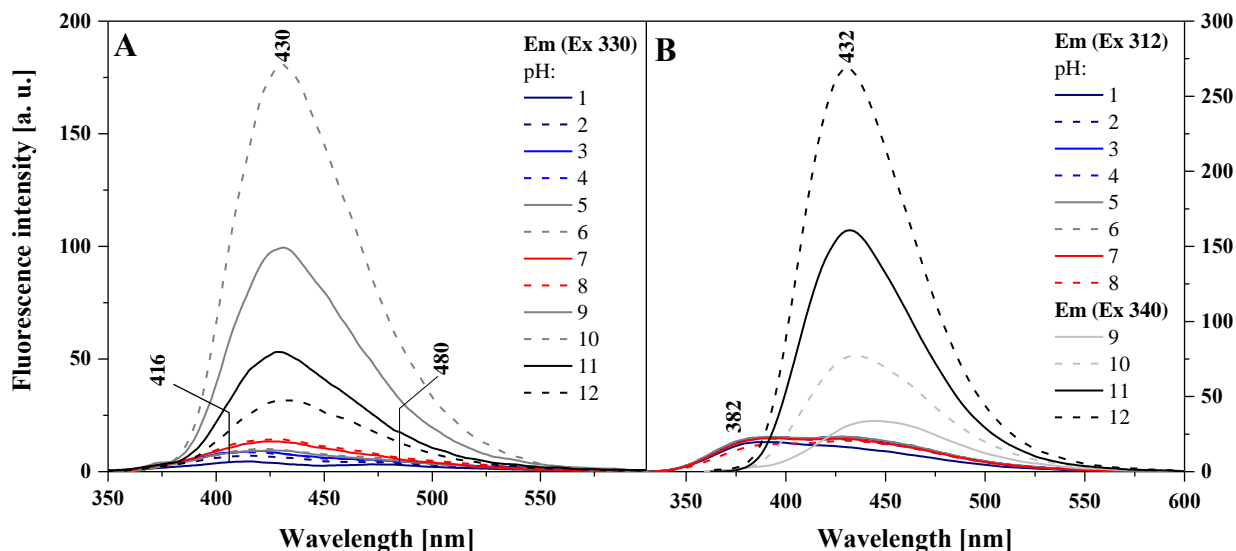

**Figure S16.** Fluorescence emission spectra of FABT (panel A) and ADAPT (panel B) dissolved in H<sub>2</sub>O at varying pH according to electronic absorption spectra.

**Table S1.** Position of the maxima of absorption and fluorescence spectra for FABT and ADAPT in different solvents.

| Solvent       | FABT                                   |       |                                          |       | ADAPT                                  |       |                                          |       |
|---------------|----------------------------------------|-------|------------------------------------------|-------|----------------------------------------|-------|------------------------------------------|-------|
|               | Absorbance<br>[nm]/[cm <sup>-1</sup> ] |       | Fluorescence<br>[nm]/[cm <sup>-1</sup> ] |       | Absorbance<br>[nm]/[cm <sup>-1</sup> ] |       | Fluorescence<br>[nm]/[cm <sup>-1</sup> ] |       |
| Methanol      | 336                                    | 29762 | 414                                      | 24155 | 292                                    | 34247 | 371                                      | 26954 |
| Butan-1-ol    | 342                                    | 29240 | 412                                      | 24272 | 294                                    | 34014 | 373                                      | 26810 |
| Ethanol       | 337                                    | 29674 | 412                                      | 24272 | 293                                    | 34130 | 372                                      | 26882 |
| Propan-2-ol   | 340                                    | 29412 | 407                                      | 24570 | 293                                    | 34130 | 372                                      | 26882 |
| Acetonitrile  | 337                                    | 29674 | 407                                      | 24570 | 291                                    | 34364 | 370                                      | 27027 |
| Ethyl acetate | 340                                    | 29412 | 399                                      | 25063 | 292                                    | 34247 | 369                                      | 27100 |
| DMSO          | 340                                    | 29412 | 409                                      | 24450 | 296                                    | 33784 | 376                                      | 26596 |
| DMF           | 340                                    | 29412 | 408                                      | 24510 | 297                                    | 33670 | 380                                      | 26316 |
| Acetone       | 340                                    | 29412 | 404                                      | 24752 | -                                      | -     | -                                        | -     |
| Toluene       | 340                                    | 29412 | 406                                      | 24631 | 293                                    | 34130 | 372                                      | 26882 |
|               |                                        |       | 501                                      | 19960 |                                        |       |                                          |       |
| Cyclohexane   | 342                                    | 29240 | 404                                      | 24752 | 293                                    | 34130 | 380                                      | 26316 |
|               |                                        |       | 502                                      | 19920 |                                        |       |                                          |       |
| Chloroform    | 340                                    | 29412 | 414                                      | 24155 | 293                                    | 34130 | 371                                      | 26954 |
|               |                                        |       | 500                                      | 20000 |                                        |       |                                          |       |
| THF           | 340                                    | 29412 | 412                                      | 24272 | 294                                    | 34014 | 371                                      | 26954 |

**Table S2.** Dielectric constant  $\epsilon$ , index of refraction  $n$  and solvent parameters  $E_T(30)$ ,  $E_T^N$  in different solvents.

| Solvent | $\epsilon$ | $n$ | $E_T(30)$ | $E_T^N$ |
|---------|------------|-----|-----------|---------|
|---------|------------|-----|-----------|---------|

|               |       |        |      |       |
|---------------|-------|--------|------|-------|
| Methanol      | 33    | 1.3265 | 55.5 | 0.765 |
| Butan-1-ol    | 17.8  | 1.3993 | 49.7 | 0.586 |
| Ethanol       | 25.3  | 1.3594 | 51.9 | 0.654 |
| Propan-2-ol   | 20.18 | 1.3772 | 48.6 | 0.552 |
| Acetonitrile  | 36.64 | 1.3416 | 45.6 | 0.460 |
| Ethyl acetate | 6.02  | 1.3723 | 38.1 | 0.228 |
| DMSO          | 47.24 | 1.4773 | 45.1 | 0.444 |
| DMF           | 36.7  | 1.4305 | 43.2 | 0.386 |
| THF           | 7.58  | 1.4072 | 37.4 | 0.207 |
| Acetone       | 21.0  | 1.3587 | 42.2 | 0.355 |
| Toluene       | 2.38  | 1.4969 | 33.9 | 0.099 |
| Cyklohexane   | 2.02  | 1.4262 | 30.9 | 0.006 |
| Chloroform    | 4.81  | 1.4429 | 39.1 | 0.259 |

**Table S3.** Position of FTIR vibrations for FABT. The asterisk denotes both the solvent and molecule band.

| FTIR - band position [cm <sup>-1</sup> ] |            |             | Vibration                |
|------------------------------------------|------------|-------------|--------------------------|
| EtOH                                     | EtOH + HCl | EtOH + NaOH |                          |
| 3205                                     | 3143       | 3568 / 3205 | v (O-H)                  |
| 1676                                     | 1676       |             | v (C=O) and v (C=N)      |
| 1622                                     | 1612       | 1641 / 1612 | v (C=N)                  |
| 1596                                     | 1596       |             |                          |
| 1546                                     | 1542       | 1554        |                          |
| 1508                                     | 1505       | 1508        |                          |
| 1433* / 1466*                            | 1466*      | 1433*       | δ (C-H) + v (C=C)        |
| 1410                                     | 1410       |             |                          |
|                                          |            | 1402        | δ (C-H) + v (C=C)        |
|                                          | 1390       |             |                          |
|                                          |            | 1371        |                          |
| 1321                                     | 1321       |             | v (C-N) in C=N-C δ (C-H) |
|                                          |            | 1305        | or v (C-O)               |
|                                          | 1287       |             | δ (N-H) + v (C-N)        |
| 1261                                     |            | 1261        |                          |

|       |       |       |                                      |
|-------|-------|-------|--------------------------------------|
| 1230  |       |       |                                      |
| 1220  |       | 1220  |                                      |
| 1166  |       |       | $\delta$ (C-C) in C-(C=O)-C          |
| 1128* | 1128* |       |                                      |
|       |       | 1111* | $\nu$ (C-N)                          |
|       |       | 1072  | $\nu$ (C-O-C)                        |
| 1043  | 1043  |       |                                      |
| 980   | 980   | 980   | $\nu_{as}$ (C-N) oraz $\delta$ (C-H) |
| 966   |       |       |                                      |
| 876   | 876   | 878   |                                      |
| 835   | 835   | 835   |                                      |

$\nu$  - valence vibration;  $\delta$  - deformation; s - symmetric; as - asymmetric

**Table S4.** Position of FTIR vibrations for ADAPT. The asterisk denotes both the solvent and molecule band.

| FTIR - band position [cm <sup>-1</sup> ] |            |             | Vibration                            |
|------------------------------------------|------------|-------------|--------------------------------------|
| EtOH                                     | EtOH + HCl | EtOH + NaOH |                                      |
|                                          |            | 3205        | $\nu$ (O-H) in NaOH                  |
| 2915                                     | 2915       |             | $\nu$ (N-H)                          |
| 1773                                     |            | 1773 / 1740 | $\nu$ (C=O)                          |
| 1697                                     | 1697       | 1652        | $\nu$ (C=O) and $\nu$ (C=N)          |
| 1615                                     | 1615       |             | $\nu$ (C=N)                          |
|                                          |            | 1596        |                                      |
| 1563                                     | 1563       | 1563        |                                      |
| 1438*                                    | 1438*      | 1417        | $\delta$ (C-H) + $\nu$ (C=C)         |
| 1371                                     | 1371       | 1371        | $\delta$ (C-H) + $\nu$ (C=C)         |
| 1320                                     | 1320       |             | $\delta$ (N-H) + $\nu$ (C-N)         |
|                                          |            | 1304        |                                      |
|                                          |            | 1225        |                                      |
| 1192                                     | 1192       |             | $\delta$ (C-C) in C-(C=O)-C          |
| 1114*                                    | 1114*      |             | and $\nu$ (C-N)                      |
|                                          |            | 1097        | $\nu$ (C-O-C)                        |
|                                          |            | 1070        |                                      |
| 987                                      | 987        | 987         | $\nu_{as}$ (C-N) oraz $\delta$ (C-H) |
| 880                                      | 880        | 880         |                                      |
| 876                                      | 876        | 876         |                                      |
| 835                                      | 835        | 835         |                                      |

$\nu$  - valence vibration;  $\delta$  - deformation; s - symmetric; as - asymmetric



**Table S5.** Position of Raman shifts for FABT. The asterisk denotes both the solvent and molecule band.

| RAMAN<br>FABT in EtOH | Vibration                                                                                   |
|-----------------------|---------------------------------------------------------------------------------------------|
| 1634                  | $\nu(\text{C}=\text{N})$                                                                    |
| 1614 / 1581           |                                                                                             |
| 1531                  | $\nu(\text{C}=\text{C})$                                                                    |
| 1513                  |                                                                                             |
| 1479                  |                                                                                             |
| 1450*                 | $\delta(\text{C}-\text{H}) + \nu(\text{C}=\text{C})$                                        |
| 1418                  | $\delta(\text{C}-\text{N})$ in $\text{C}=\text{N}-\text{C}$ and $\delta(\text{C}-\text{H})$ |
| 1324                  |                                                                                             |
| 1135                  | $\nu(\text{C}-\text{O})$ or $\delta(\text{N}-\text{H}) + \nu(\text{C}-\text{N})$            |
| 1105*                 | $\nu(\text{C}-\text{N})$                                                                    |
| 988                   | $\nu(\text{C}-\text{F})$                                                                    |
| 746                   | $\nu(\text{C}-\text{F})$ and solvent                                                        |
| 693 / 668 / 571       |                                                                                             |

**Table S6.** The plane under the emission curve, the value of absorbance at the excitation wavelength and fluorescence quantum yield for FABT and ADAPT.

| Solvent    | FABT      |                       |          | ADAPT     |                       |          |
|------------|-----------|-----------------------|----------|-----------|-----------------------|----------|
|            | $I^a$     | $\lambda_{\text{ex}}$ | $\Phi_F$ | $I^a$     | $\lambda_{\text{ex}}$ | $\Phi_F$ |
| Methanol   | 4757.9354 | 317                   | 0.0591   | 6569.5102 | 272                   | 0.0948   |
| Ethanol    | 5461.8577 | 321                   | 0.0703   | 6700.7614 | 272                   | 0.1019   |
| Chloroform | 40.4381   | 320                   | 0.0006   | 4703.9238 | 272                   | 0.0804   |
| Toluene    | 37.3047   | 320                   | 0.0006   | 25.3899   | 273                   | 0.0005   |

<sup>a</sup> the plane under the emission curve

**Table S7.** Vertical excitation energies (E), oscillator strength (f), and juxtaposition with experimental data.

| E (eV) | f    | Maxima of experimental bands (eV)              |
|--------|------|------------------------------------------------|
| 3.50   | 0.86 | 3.68 (strong)                                  |
| 4.13   | 0.02 | 4.14 (slight enhancement of an intensive band) |

**Table S8.** Vertical fluorescence energies (E), their origin and juxtaposition with experimental data.

| E (eV) | Origin    | Maxima of experimental fluorescence bands (eV) |
|--------|-----------|------------------------------------------------|
| 2.66   | Keto form | 2.50                                           |
| 2.75   | Enol form | 2.92                                           |

**Table S9.** Energy (in kcal/mol) of various electronic states relative to the minimum in the enol ground state.

| Name                                              | E [kcal/mol] |
|---------------------------------------------------|--------------|
| Enol ground state                                 | 0            |
| Enol – excited state energy minimum               | 71.02        |
| Enol – excited state in the ground state geometry | 80.71        |
| Ketone                                            | 7.52         |
| Ketone – excited state energy minimum             | 73.14        |
| TS for the excited state enol->ketone transfer    | 77.20        |
| Excitation light energy (328 nm)                  | 87.16        |
